# Supplementary material for: Targeting intermediary metabolism enhances the efficacy of BH3 mimetic therapy in hematologic malignancies
Source: PubMed Central journal article supplement — Haematologica. 2018 Nov 22;104(5):1016–25. doi: 10.3324/haematol.2018.204701 (PMC6518917; doi:10.3324/haematol.2018.204701), 2019-05

## Targeting intermediary metabolism enhances the efficacy of BH3 mimetic therapy in hematologic malignancies

Aoula Al-Zabeeby,<sup>1</sup> Meike Vogler,<sup>2</sup> Mateus Milani,<sup>1</sup> Caitlin Richards,<sup>1</sup> Ahoud Alotibi,<sup>1</sup> Georgia Greaves,<sup>1</sup> Martin J.S. Dyer,<sup>3</sup> Gerald M. Cohen<sup>1,4</sup> and Shankar Varadarajan<sup>1,4\*</sup>

<sup>1</sup>Department of Molecular and Clinical Cancer Medicine, Institute of Translational Medicine, University of Liverpool, UK; <sup>2</sup>Institute for Experimental Cancer Research in Pediatrics, Goethe-University, Frankfurt, Germany; <sup>3</sup>Ernest and Helen Scott Haematological Research Institute, Leicester Cancer Research Centre, University of Leicester, Leicester Royal Infirmary, UK and <sup>4</sup>Department of Molecular and Clinical Cancer Pharmacology, Institute of Translational Medicine, University of Liverpool, UK

©2019 Ferrata Storti Foundation. This is an open-access paper. doi:10.3324/haematol.2018.204701

Received: August 16, 2018.

Accepted: November 20, 2018.

Pre-published: November 22, 2018.

Correspondence: SHANKAR VARADARAJAN svar@liverpool.ac.uk

---

## **Supplemental information**

**Supplemental Figure S1. First *in vivo* dose of navitoclax resulted in marked ultrastructural changes in CLL cells.** CLL cells isolated from two different patients prior to receiving navitoclax and 4 h after the first *in vivo* dosing during day 1 of the lead-in-period (L1D1) were incubated *ex vivo* for a further 8 h, before fixation in 2% glutaraldehyde and transmission electron microscopy. CLL cells from patients exposed to navitoclax exhibited chromatin condensation and rupture of the outer mitochondrial membrane. Scale bar – 500 nm.

**Supplemental Figure S2. Rapid development of resistance to BH3 mimetic-mediated apoptosis in haematological cell lines.** (A) Exposure of MAVER-1, K562 and H929 cells to ABT-199 (10 nM), A-1331852 (10 nM) and A-1210477 (10  $\mu$ M), respectively resulted in a time dependent induction of apoptosis as assessed by western blotting for the indicated proteins. (B-D) Schemes used for developing the other three models of drug resistance as described in the Methods. Assessment of apoptosis by PS externalisation showed that resistance developed in the different cellular models following exposure for 4 h to ABT-199 (10 nM), A-1331852 (10 nM) and A-1210477 (5  $\mu$ M), respectively. \*\*\*P  $\leq$  0.001; Error bars = Mean  $\pm$  SEM (n=3).

**Supplemental Figure S3. Resistance to BH3 mimetic-mediated apoptosis could not be attributed to marked changes in the expression levels of BCL2 family members.** Immunoblots of BCL-2 family members showed no major changes in the indicated cell lines, during the development of resistance, depicted as A, C and E. A is the sensitive parent line, whereas C and E are relatively more resistant to the BH3 mimetics compared to A. \* in the PUMA immunoblot depicts a non-specific band.

**Supplemental Figure S4. Protein-protein interactions among anti- and pro-apoptotic BCL-2 family proteins are similar in both sensitive and resistant cells.** Immunoprecipitates of BIM and PUMA in MAVER-1, K562 and H929 (A and E) cells showed no major differences in the binding of the indicated proteins. BC represents the beads control.

**Supplemental Figure S5. Resistance to BH3 mimetics in the different resistance models can be overcome by simultaneous inhibition of multiple BCL-2 members.** (A-C) Sensitive and resistant lines of MAVER-1, K562 and H929 from the different resistance models, as explained in methods and depicted in Supplemental figure 2, were exposed for 4 h to ABT-199 (10 nM), A-1331852 (10 nM) or A-1210477 (5  $\mu$ M) and the extent of apoptosis assessed by PS externalisation. \*\*\* $P \leq 0.001$ , \*\* $P \leq 0.01$ ; Error bars = Mean  $\pm$  SEM (n=3).

**Supplemental Figure S6. Glutamine deprivation sensitises the different cell lines to BH3 mimetic-mediated apoptosis.** (A-C) Sensitive and resistant lines of MAVER-1, K562 and H929 from the different resistance models, as explained in methods and depicted in Supplemental figure 2, were deprived of glutamine for 16 h and the extent of apoptosis assessed following a 4 h exposure to ABT-199 (10 nM), A-1331852 (10 nM) or A-1210477 (5  $\mu$ M). \*\*\* $P \leq 0.001$ ; Error bars = Mean  $\pm$  SEM (n=3).

**Supplemental Figure S7. Modulation of intermediary metabolism enhances sensitivity to BH3 mimetics in distinct haematological cell lines** Exposure to GPNA (5 mM for 48 h), CB-839 (10  $\mu$ M for 72 h), SB204990 (1  $\mu$ M for 72 h), GSK2194069 (100 nM for 48 h), simvastatin (250 nM for 72 h) or torin-1 (10 nM for 24 h) enhances the sensitivity of the chemoresistant MAVER-1 and H929 cells to their respective BH3 mimetics. Apoptosis was assessed by PS externalisation following exposure for 4 h to ABT-199 (10 nM) or A-1210477 (5  $\mu$ M). \*\*\* $P \leq 0.001$ ; \* $P \leq 0.1$ ; Error bars = Mean  $\pm$  SEM (n=3).

# Figure S1

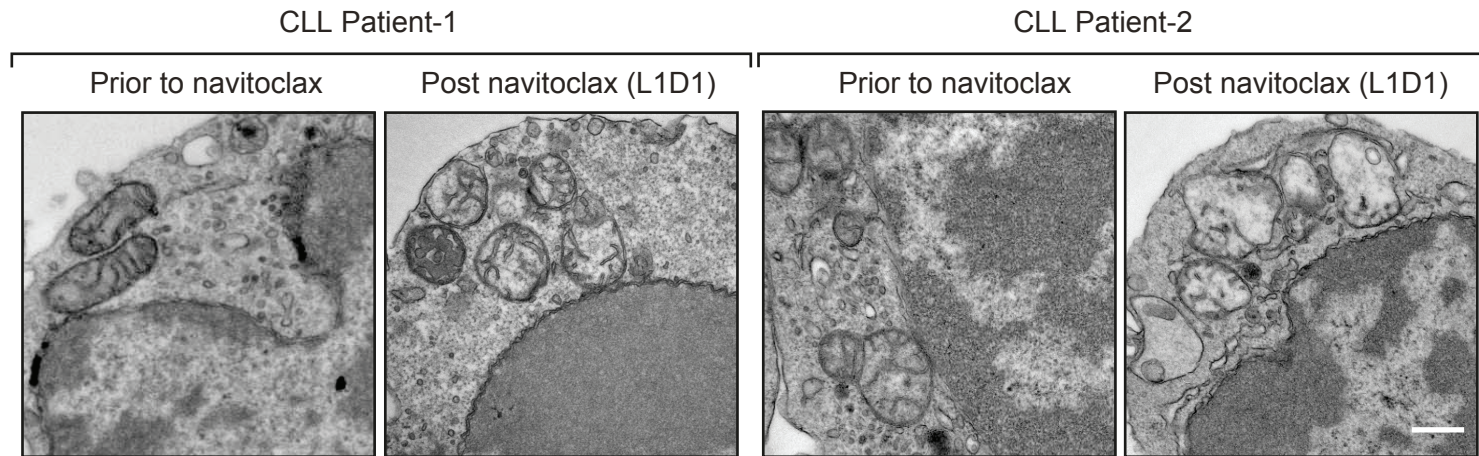

# Figure S2

## A

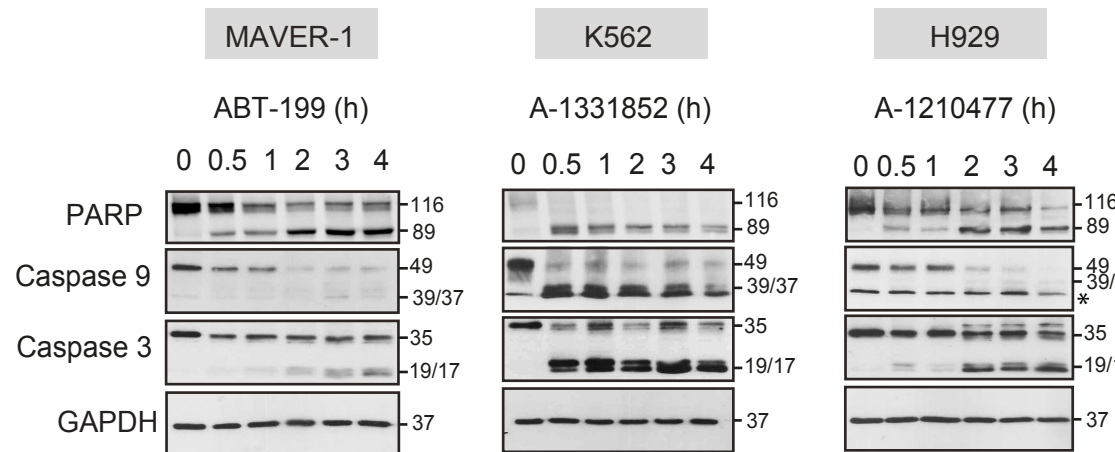

## B

Specific BH3 mimetics

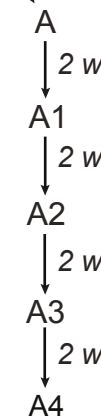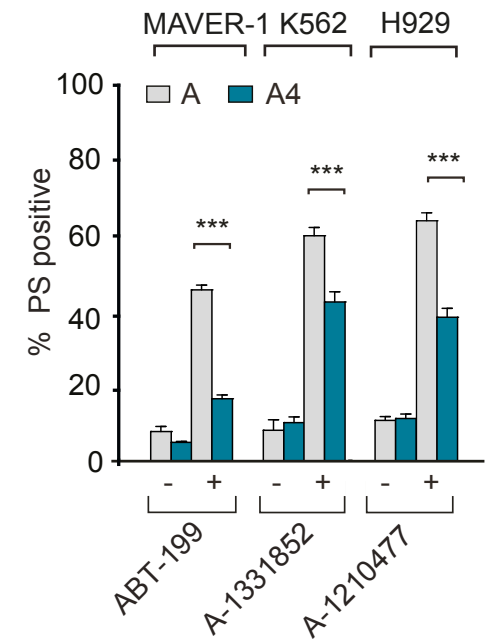

## C

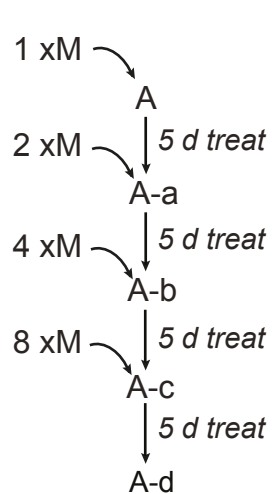

x = nM for ABT-199/ A-1331852 and  $\mu$ M for A-1210477

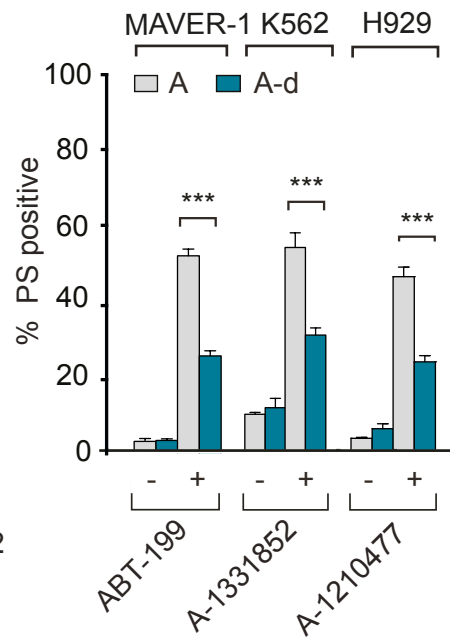

## D

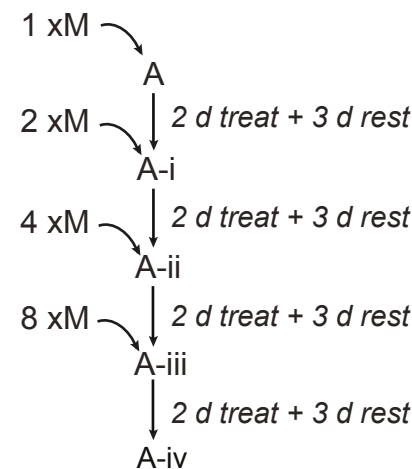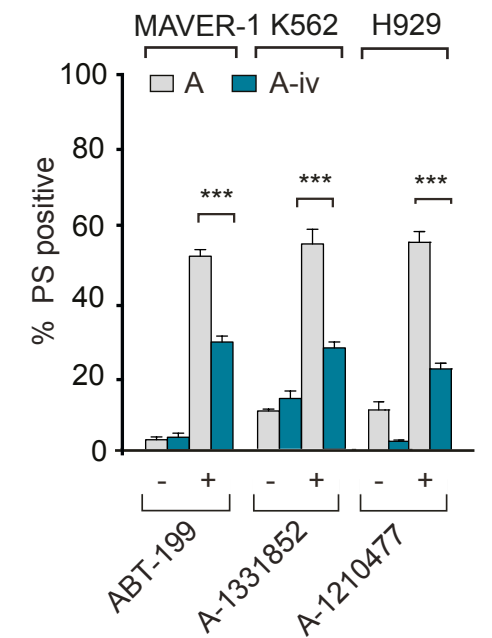

Figure S3

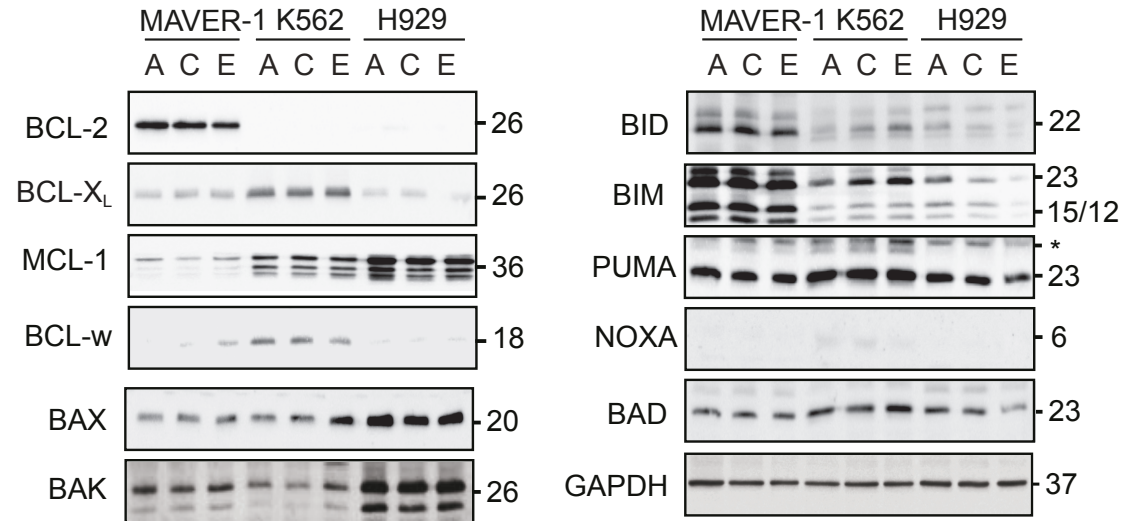

# Figure S4

## MAVER-1

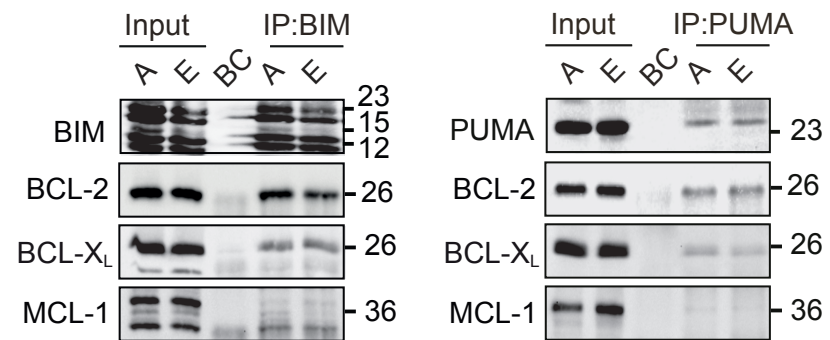

## K562

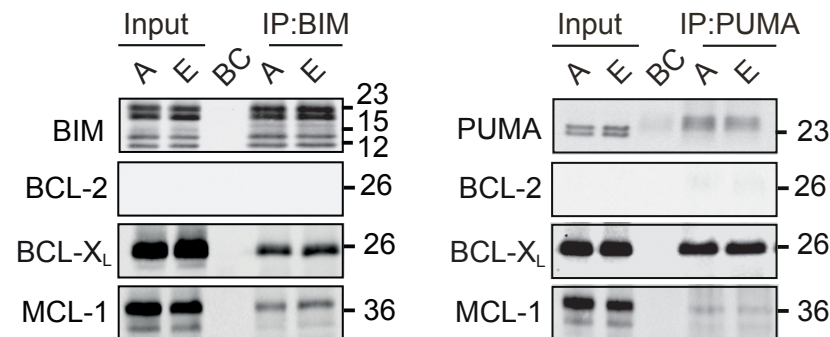

## H929

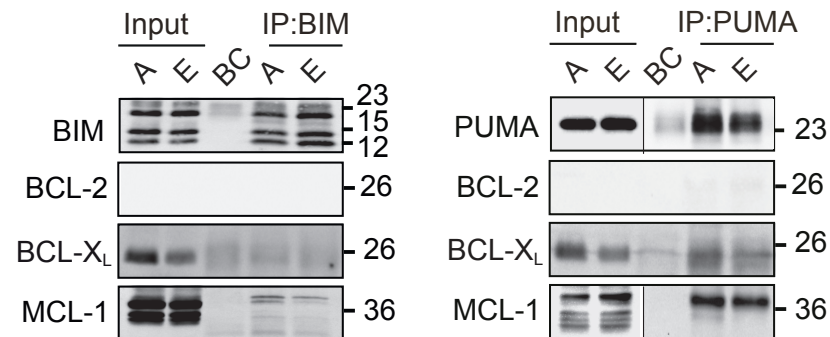

# Figure S5

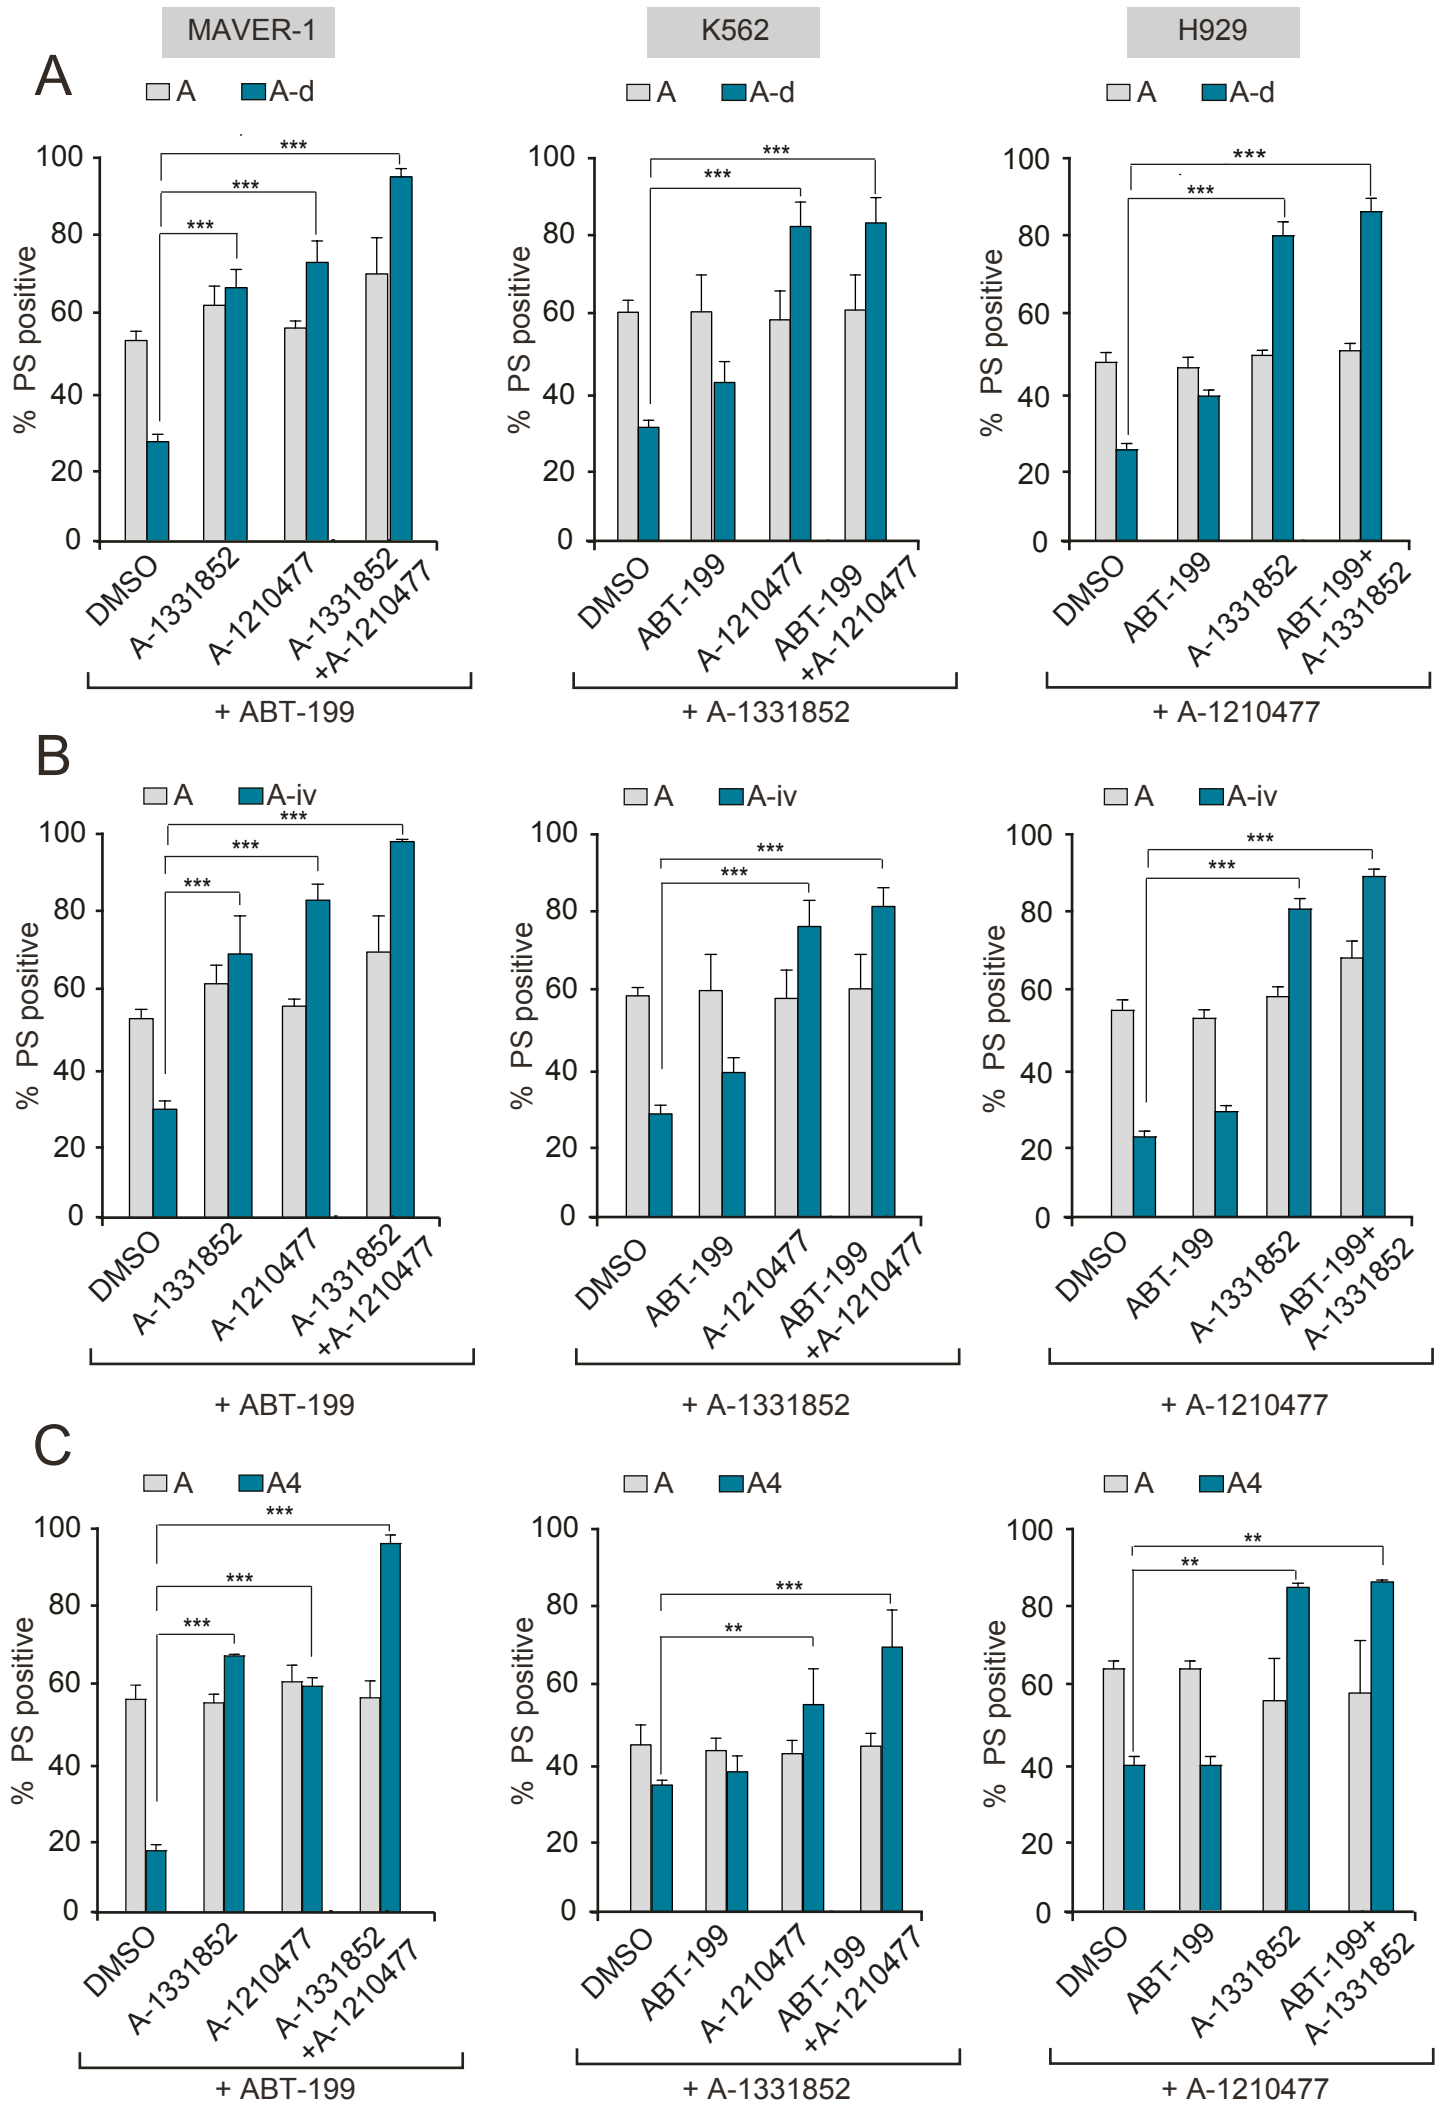

Figure S6

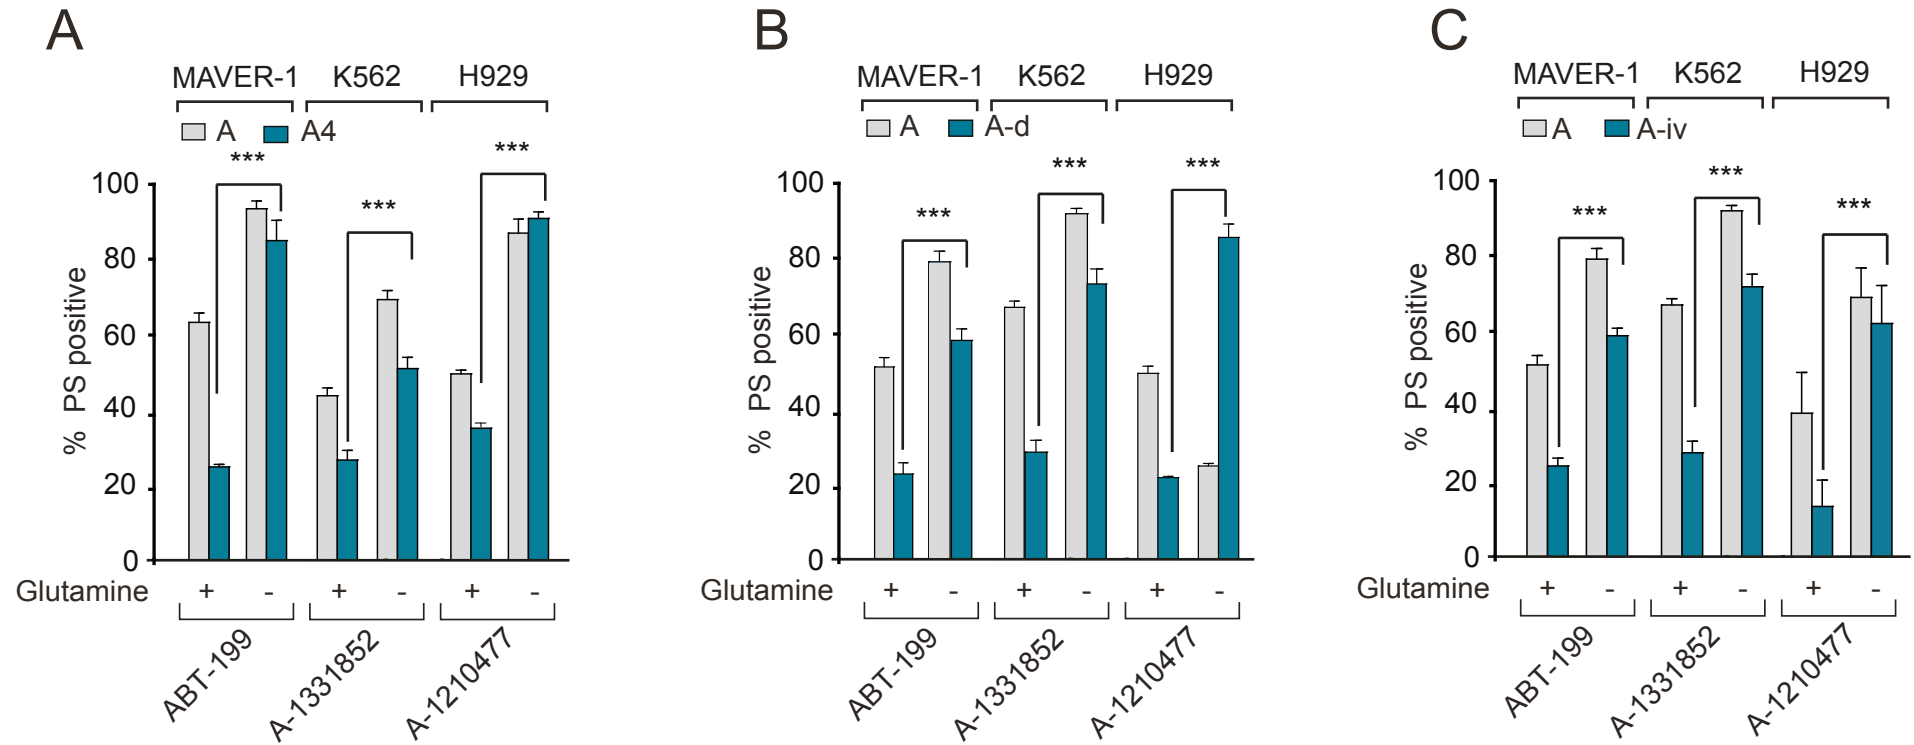

# Figure S7

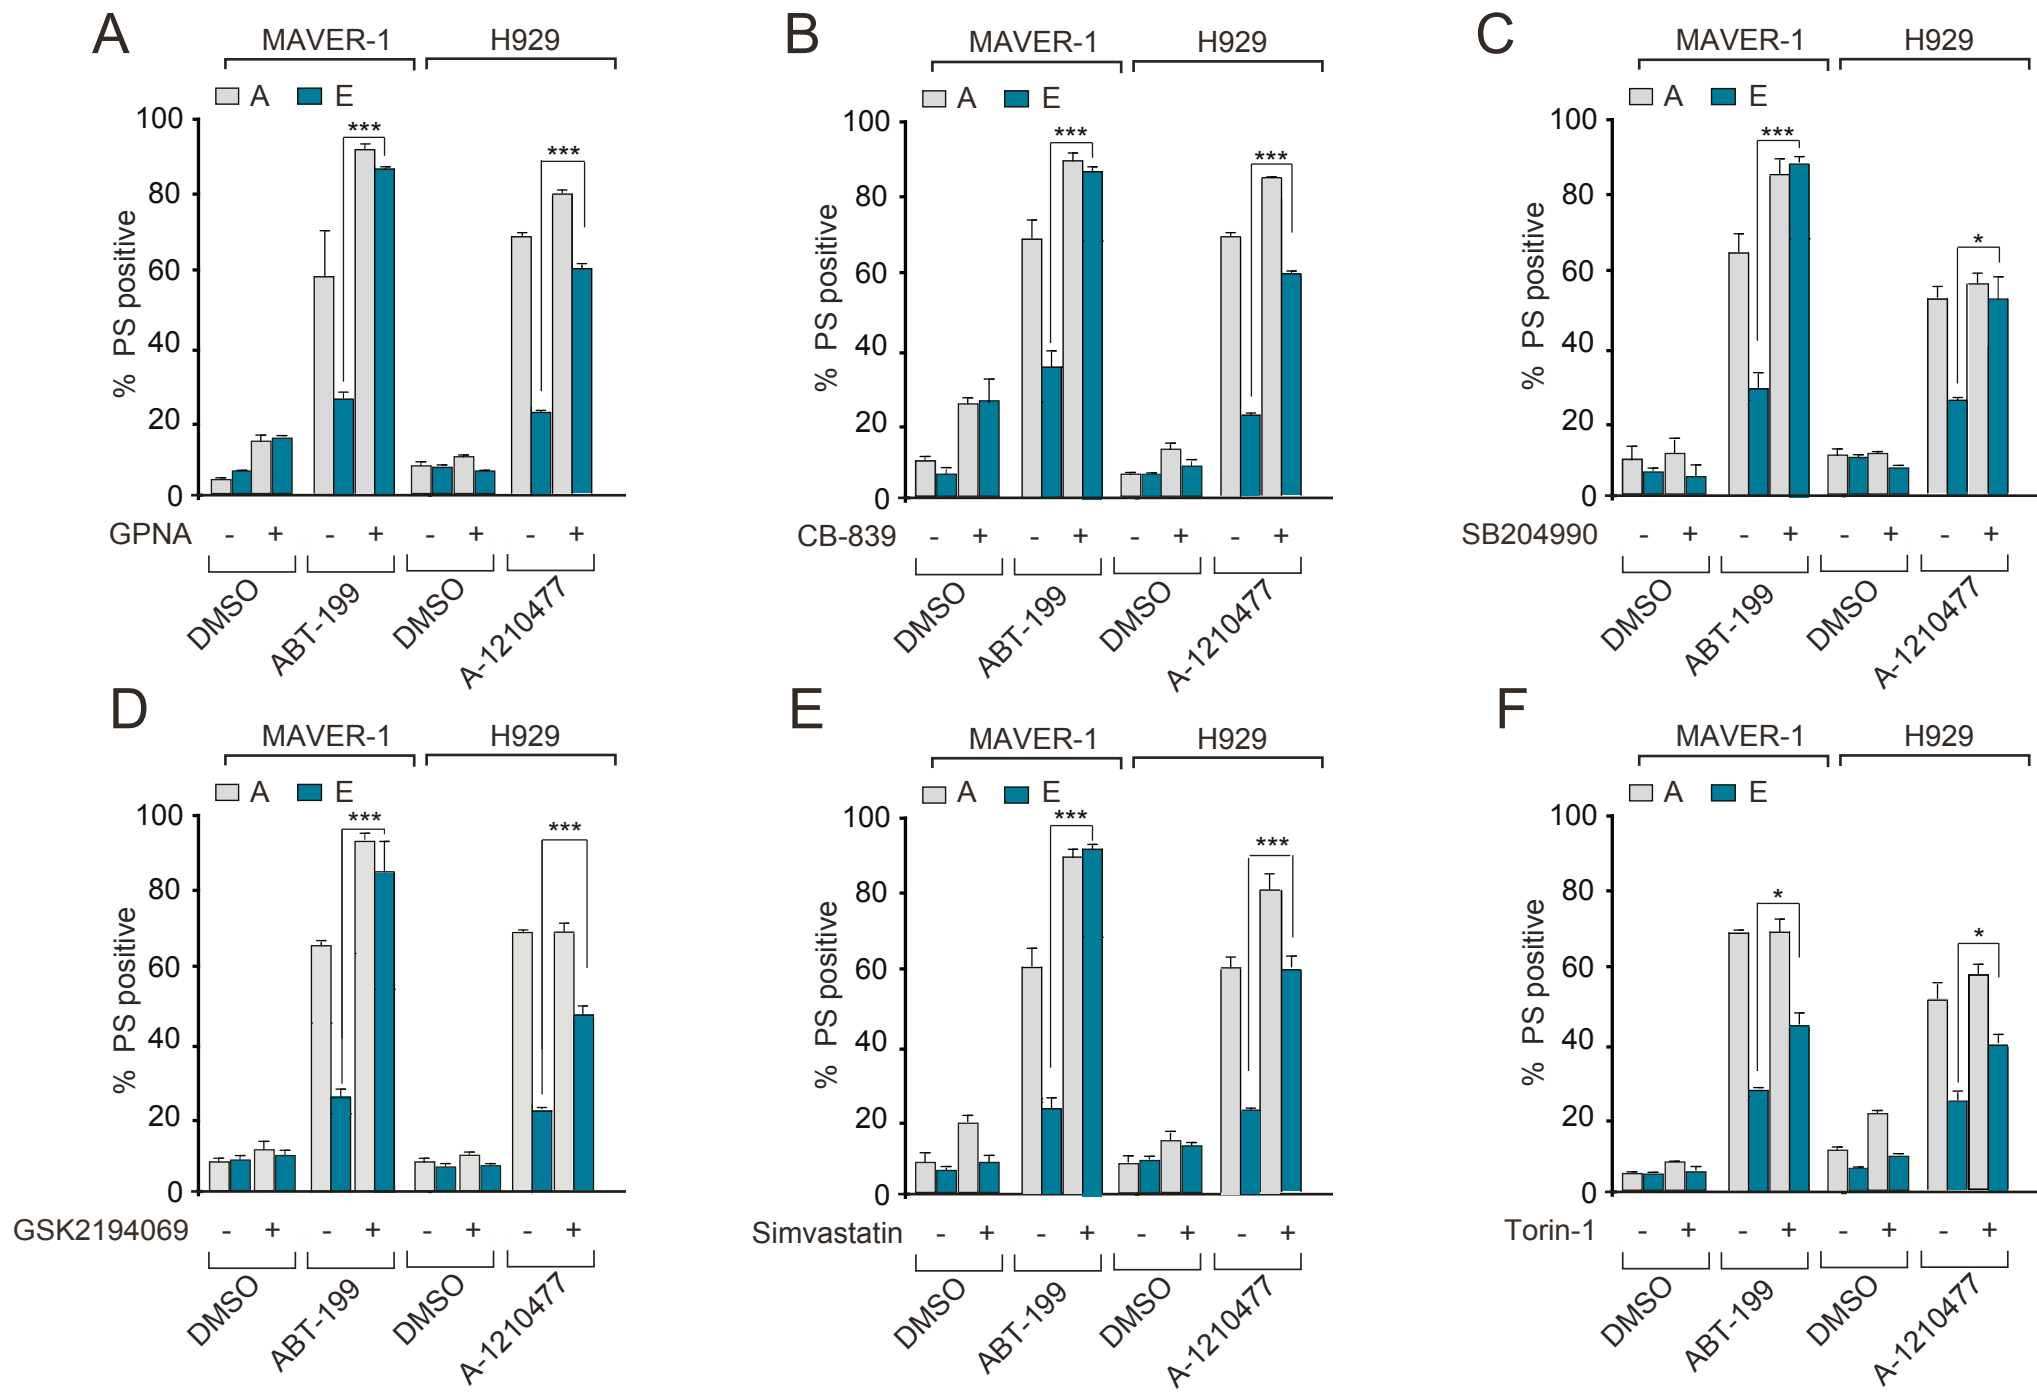

Supplement: 2018.204701.AL-ZEBEEBY_SUPPL.pdf [file 2018.204701.AL-ZEBEEBY_SUPPL.pdf]
