# Supplementary material for: Targeting intermediary metabolism enhances the efficacy of BH3 mimetic therapy in hematologic malignancies
Source: PubMed Central journal article supplement — Haematologica. 2018 Nov 22;104(5):1016–25. doi: 10.3324/haematol.2018.204701 (PMC6518917; doi:10.3324/haematol.2018.204701), 2019-05
Supplement: 2018_204701-Disclosures_and_Contributions.pdf [file 2018_204701-Disclosures_and_Contributions.pdf]

Haematologica  
HAEMATOL/2018/204701  
Version 3

Targeting intermediary metabolism enhances the efficacy of BH3  
mimetic therapy in haematological malignancies

Aoula Al-Zebeeby, Meike Vogler, Mateus Milani, Caitlin Richards,  
Ahoud Alotibi, Georgia Greaves, Martin J.S. Dyer, Gerald M. Cohen,  
and Shankar Varadarajan

Disclosures: The authors do not disclose any conflict of interest.

Contributions: AA-Z planned and performed most of the experiments, MV planned and performed the in vivo CLL studies, MM and CR performed some of the glutamine deprivation studies, AA performed autophagy experiments, GG carried out BCL-2 family expression profile studies, MJSD supervised, planned and analysed the in vivo CLL studies, GMC and SV supervised the study, planned the experiments, analysed data and wrote the manuscript.
